# Supplementary material for: Inhibitory Activity of Essential Oils of Mentha spicata and Eucalyptus globulus on Biofilms of Streptococcus mutans in an In Vitro Model
Source: MDPI journal article supplement (doi:10.3390/antibiotics12020369), 2023-02-10
Supplement: s1 [file s1]

## Supplementary material

### **Inhibitory Activity of Essential Oils of *Mentha spicata* and *Eucalyptus globulus* on Biofilms of *Streptococcus mutans* in An In Vitro Model**

Guillermo Ernesto Landeo-Villanueva <sup>1</sup>, María Elena Salazar-Salvatierra <sup>2</sup>, Julio Reynaldo Ruiz-Quiroz <sup>2</sup>, Noemi Zuta-Arriola <sup>3</sup>, Benjamín Jarama-Soto <sup>4</sup>, and Oscar Herrera-Calderón <sup>5,\*</sup>, Josefa Bertha Pari-Olarte <sup>6</sup>; Eddie Loyo-la-Gonzales <sup>7</sup>

<sup>1</sup> Faculty of Pharmacy and Biochemistry, Universidad Nacional Mayor de San Marcos, Jr. Puno 1002, Lima 15001, Peru

<sup>2</sup> Institute for Research in Biological Chemistry, Microbiology and Biotechnology "Marco Antonio Garrido Malo", Faculty of Pharmacy and Biochemistry, Universidad Nacional Mayor de San Marcos. Lima Peru

<sup>3</sup> Faculty of Health Science, Universidad Nacional del Callao, Callao, Peru

<sup>4</sup> School of Human Medicine, Faculty of Health Sciences, Universidad Peruana Unión, Lima, Peru

<sup>5</sup> Department of Pharmacology, Bromatology and Toxicology, Faculty of Pharmacy and Biochemistry, Universidad Nacional Mayor de San Marcos, Jr. Puno 1002, Lima 15001, Peru

<sup>6</sup> Department of Pharmaceutical Chemistry, Faculty of Pharmacy and Biochemistry, Universidad Nacional San Luis Gonzaga, Ica 11001, Peru.

<sup>7</sup> Department of Pharmaceutical Science, Faculty of Pharmacy and Biochemistry, Universidad Nacional San Luis Gonzaga, Ica 11001, Peru

- Correspondence: oherreraca@unmsm.edu.pe; Tel.: +51 956550510

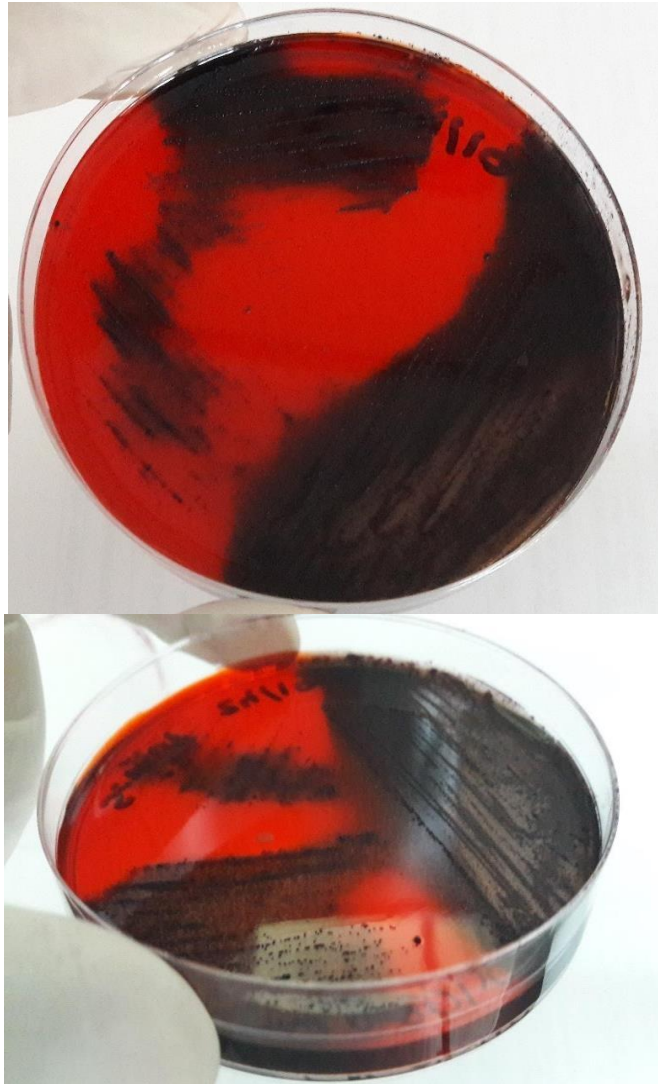

Figure S1: Ability to form biofilms by the Congo Red method.
